# Supplementary material
Source: PubMed Central journal article supplement (PMC6645855)
Supplement: ao8b00184_si_001.pdf [file ao8b00184_si_001.pdf]

**A Predictive Model for the Sequence-Dependent Fluorogenic Response of Forced-Intercalation Peptide Nucleic Acid (FIT-PNA)**

Itamar Peled<sup>a</sup> and Eylon Yavin<sup>a,\*</sup>

<sup>a</sup>The School of Pharmacy, Faculty of Medicine, The Hebrew University of Jerusalem, Hadassah Ein-Kerem, Jerusalem 91120, Israel.

\*E-mail: [eylony@ekmd.huji.ac.il](mailto:eylony@ekmd.huji.ac.il); Fax: +972-2-6757574; [Tel: +972-2-6758692](tel:+972-2-6758692).

**Tables of contents:**

|                                              |           |        |
|----------------------------------------------|-----------|--------|
| HPLC chromatograms of pure FIT-PNAs          | Figure S1 | S3-S5  |
| DNA sequences                                | Table S1  | S6     |
| DNA sequences for generating figures 2 and 3 | Table S2  | S7     |
| Calculation of $\Delta H$ NNI                |           | S8     |
| Data used to generate Figure 6               | Table S3  | S9-S11 |

**Figure S1.** HPLC chromatograms of purified FIT-PNAs. Over 95% purity for all FIT-PNAs

RP-HPLC (Shimadzu LC2010), semi-preparative C18 reverse-phase column (Phenomenex, Jupiter 300 A) at a flow rate of 4 mL/min. Mobile phase: 0.1% TFA in H<sub>2</sub>O (A) and acetonitrile (B).

Gradient: 0-10 min: 90% A, 10% B. 10-30 min: linear gradient from 90% A-10%B to 40% A-60% B.

30-37 min: linear gradient from 40% A-60%B to 10% A-90% B. 37-40 min: 5% A-95% B.

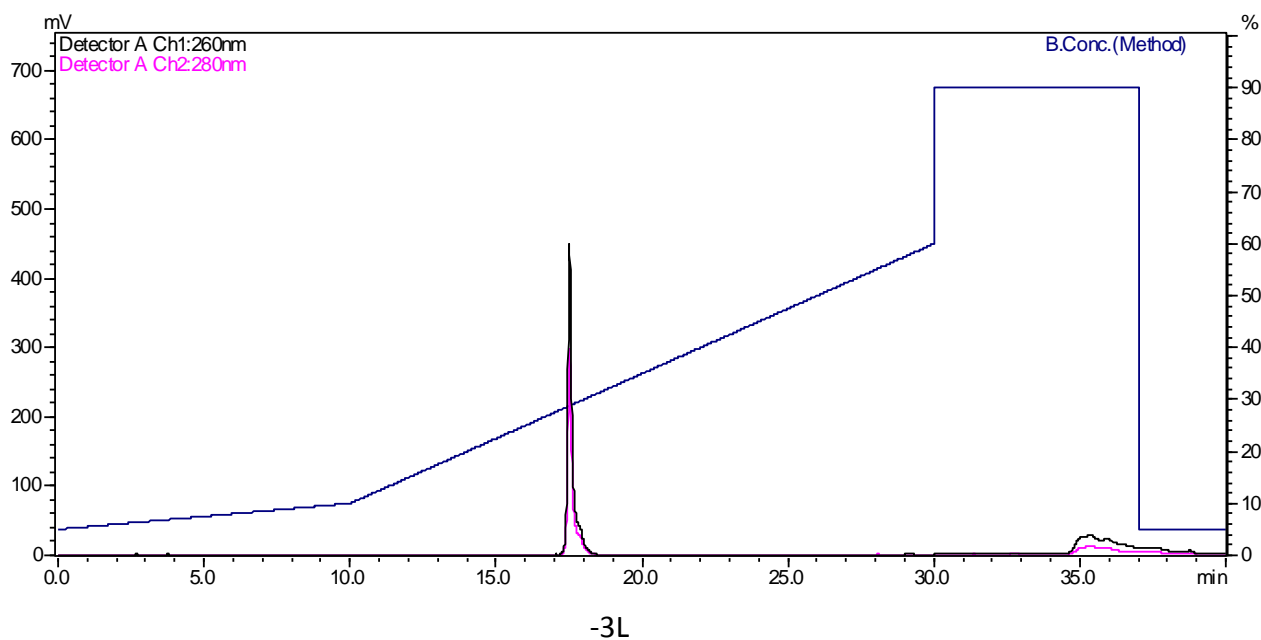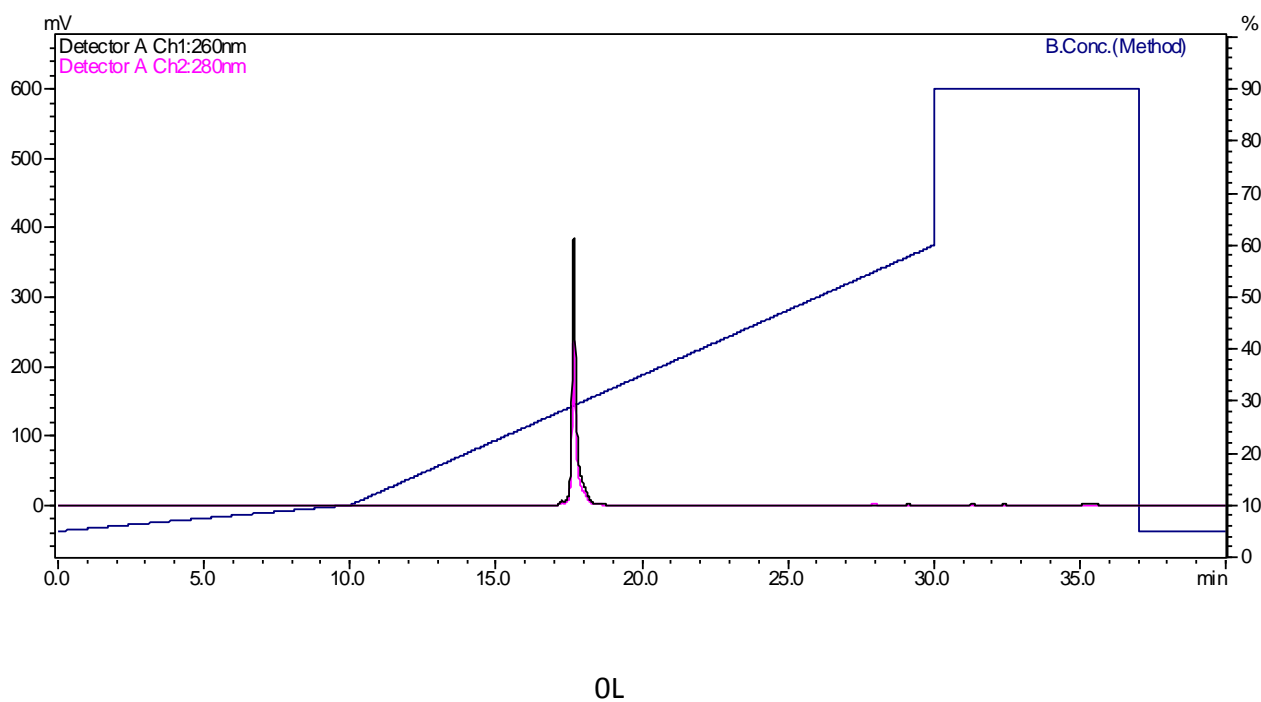

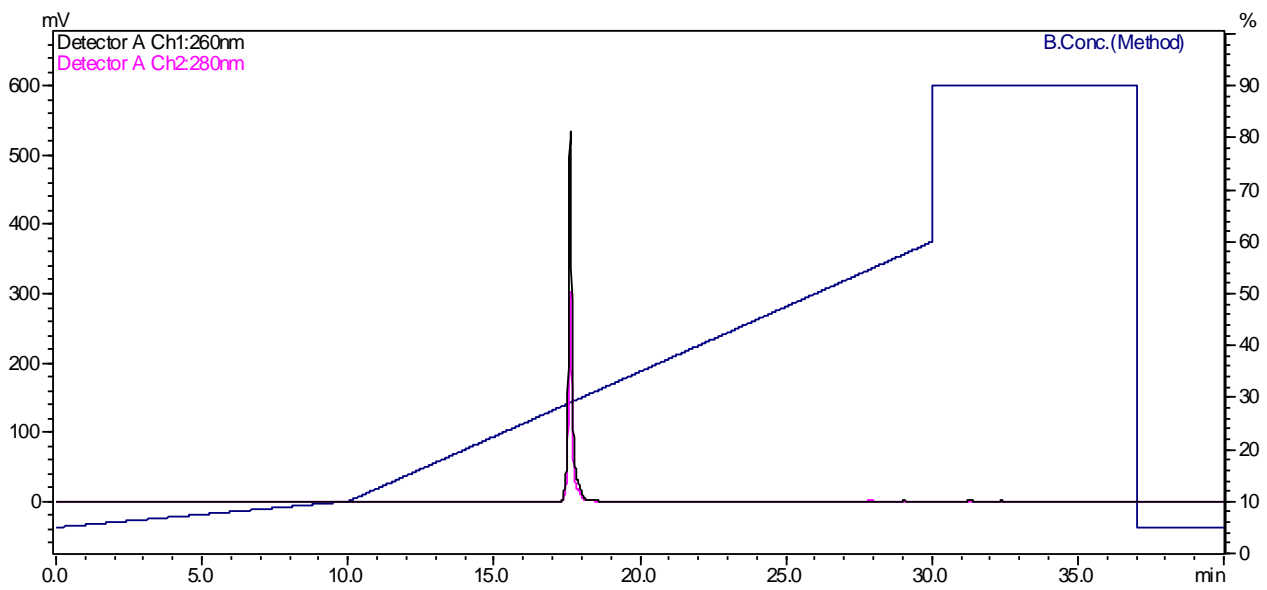

+3L

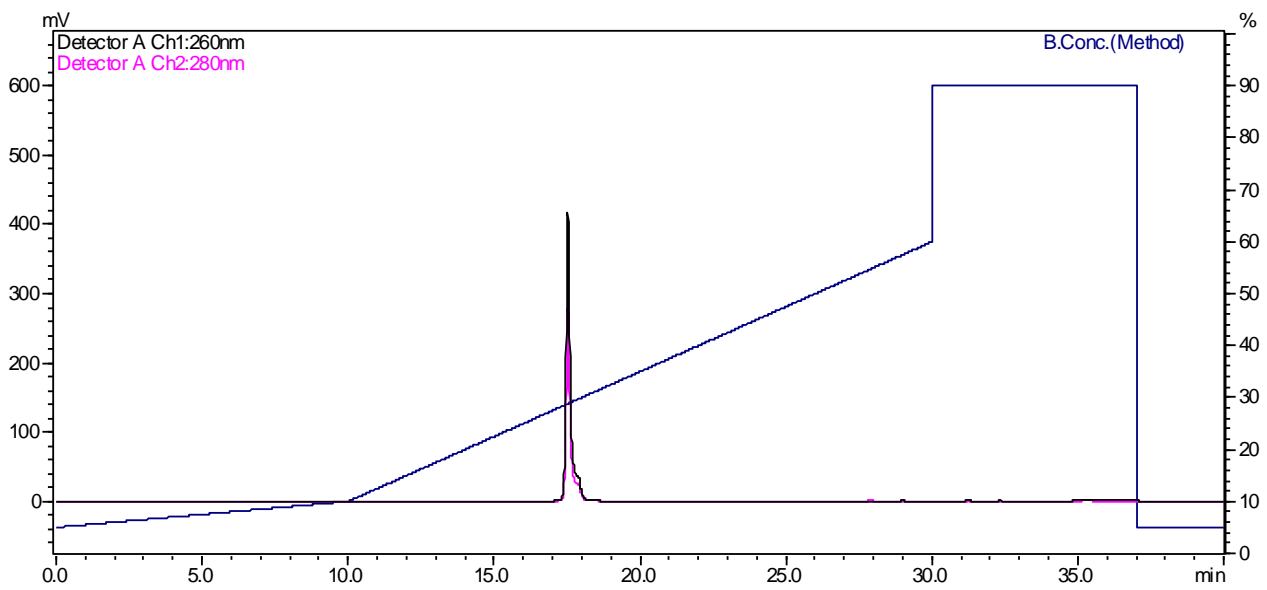

-3R

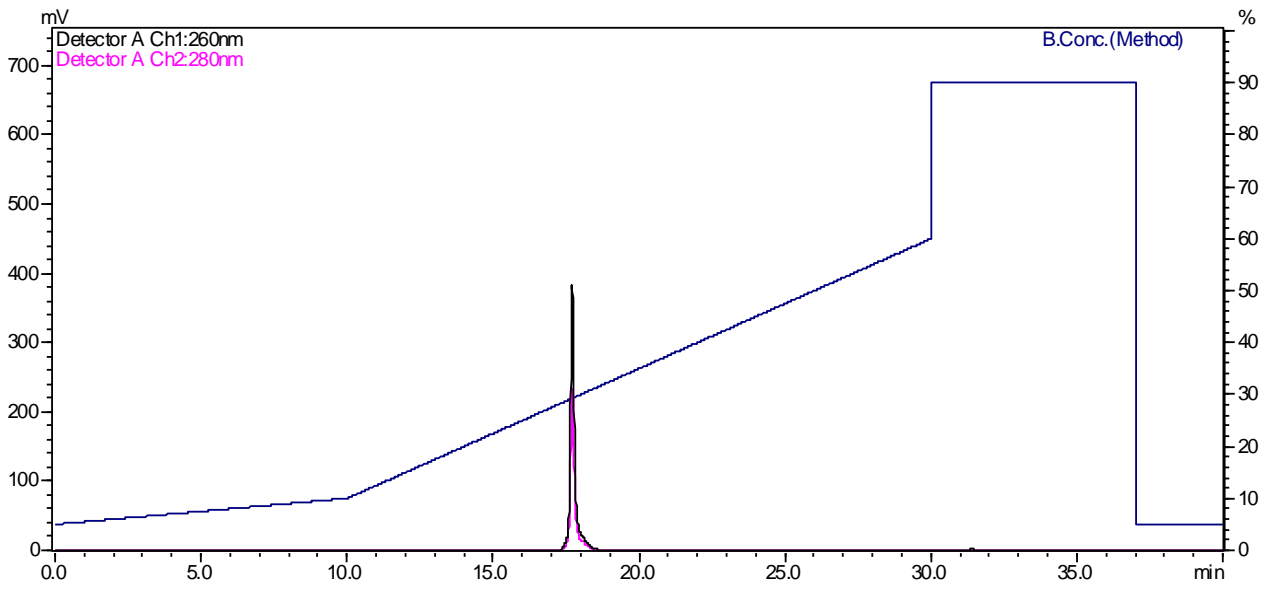

OR

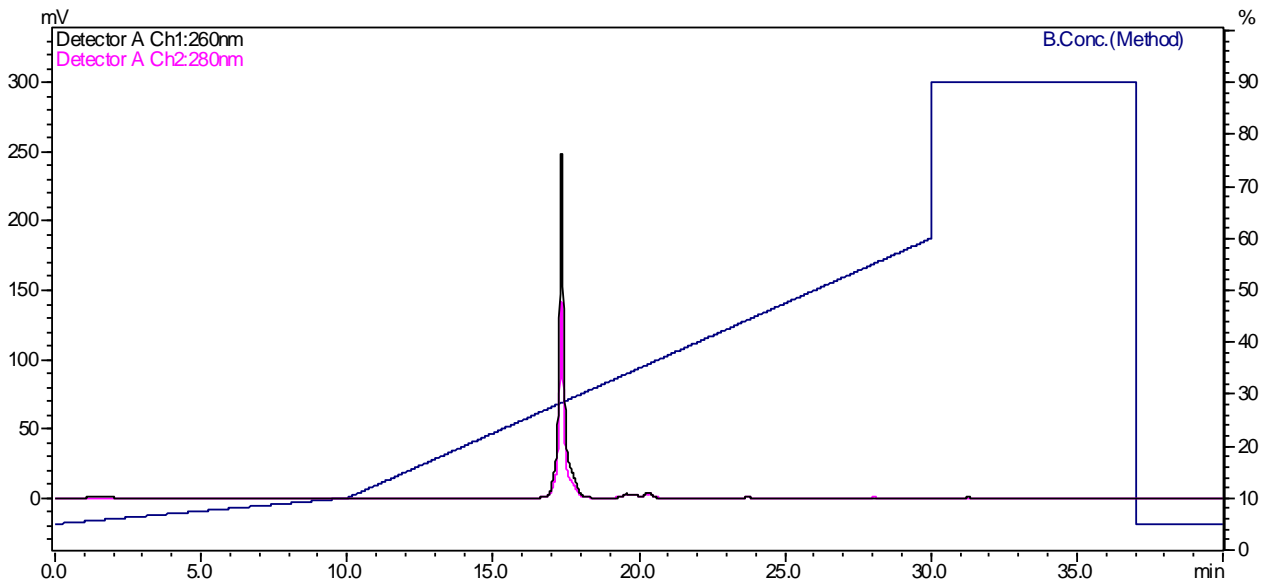

+3R

DNA sequences:

**A:** <sup>5</sup>CCCCTAGATCATCAGCTATGT**A**TGTTGCTTTTGATAATAAAAAT<sup>3</sup>  
**B:** <sup>5</sup>CCCCTAGATCATCAGCTATGT**G**TGTTGCTTTTGATAATAAAAAT<sup>3</sup>  
**C:** <sup>5</sup>CCCCTAGATCATCAGCTATGT**T**TGTTGCTTTTGATAATAAAAAT<sup>3</sup>  
**D:** <sup>5</sup>CCCCTAGATCATCAGCTATGT**C**TGTTGCTTTTGATAATAAAAAT<sup>3</sup>  
**E:** <sup>5</sup>CCCCTAGATCATCAGCTATGA**A**TGTTGCTTTTGATAATAAAAAT<sup>3</sup>  
**F:** <sup>5</sup>CCCCTAGATCATCAGCTATGC**A**TGTTGCTTTTGATAATAAAAAT<sup>3</sup>  
**G:** <sup>5</sup>CCCCTAGATCATCAGCTATGG**A**TGTTGCTTTTGATAATAAAAAT<sup>3</sup>  
**H:** <sup>5</sup>CCCCTAGATCATCAGCTAT**T**TATGTTGCTTTTGATAATAAAAAT<sup>3</sup>  
**I:** <sup>5</sup>CCCCTAGATCATCAGCTAT**A**T**A**TGTTGCTTTTGATAATAAAAAT<sup>3</sup>  
**J:** <sup>5</sup>CCCCTAGATCATCAGCTAT**C**T**A**TGTTGCTTTTGATAATAAAAAT<sup>3</sup>  
**K:** <sup>5</sup>CCCCTAGATCATCAGCT**A**AGT**A**TGTTGCTTTTGATAATAAAAAT<sup>3</sup>  
**L:** <sup>5</sup>CCCCTAGATCATCAGCT**G**T**G**T**A**TGTTGCTTTTGATAATAAAAAT<sup>3</sup>  
**M:** <sup>5</sup>CCCCTAGATCATCAGCA**A**TGT**A**TGTTGCTTTTGATAATAAAAAT<sup>3</sup>  
**N:** <sup>5</sup>CCCCTAGATCATCAGCTATGT**A**A**G**TGTTGCTTTTGATAATAAAAAT<sup>3</sup>  
**O:** <sup>5</sup>CCCCTAGATCATCAGCTATGT**A**C**G**TGTTGCTTTTGATAATAAAAAT<sup>3</sup>  
**P:** <sup>5</sup>CCCCTAGATCATCAGCTATGT**A**G**G**TGTTGCTTTTGATAATAAAAAT<sup>3</sup>  
**Q:** <sup>5</sup>CCCCTAGATCATCAGCTATGT**A**T**T**TGCTTTTGATAATAAAAAT<sup>3</sup>  
**R:** <sup>5</sup>CCCCTAGATCATCAGCTATGT**A**T**A**TGCTTTTGATAATAAAAAT<sup>3</sup>  
**S:** <sup>5</sup>CCCCTAGATCATCAGCTATGT**A**T**C**TGCTTTTGATAATAAAAAT<sup>3</sup>  
**T:** <sup>5</sup>CCCCTAGATCATCAGCTATGT**A**T**G**A**T**GCTTTTGATAATAAAAAT<sup>3</sup>  
**U:** <sup>5</sup>CCCCTAGATCATCAGCTATGT**A**T**G**T**A**GCTTTTGATAATAAAAAT<sup>3</sup>  
**V:** <sup>5</sup>CCCCTAGATCATCAGCTATGT**A**T**G**T**A**CTTTTGATAATAAAAAT<sup>3</sup>  
**W:** <sup>5</sup>CCCCTAGATCATCAGCTATGT**A**T**G**T**C**TTTTGATAATAAAAAT<sup>3</sup>

**Table S1:** A-W DNA sequences were hybridized to FIT-PNA's to create a 114 mismatched FIT-PNA:DNA duplexes ('A' corresponds to K13-C580Y and 'G' to K13-WT.)

**Table S2:** DNA sequences used to create data in Figures 2 and 3:

‘R’ PNA’s: <sup>3</sup>TAGTCGATACAT**BC**AAACGAAAAC<sup>5</sup>  
<sup>5</sup>CCCCTAGATCATCAGCTATGT**AT**GTTGCTTTTGATAATAAAAT<sup>3</sup>  
 ‘L’ PNA’s: <sup>3</sup>TAGTCGATAC**BT**ACAACGAAAAC<sup>5</sup>

DNA SEQUENCES:

**A:** <sup>5</sup>CCCCTAGATCATCAGCTATGT**AT**GTTGCTTTTGATAATAAAAT<sup>3</sup>  
**B:** <sup>5</sup>CCCCTAGATCATCAGCTATGT**G**TGTTGCTTTTGATAATAAAAT<sup>3</sup>  
**C:** <sup>5</sup>CCCCTAGATCATCAGCTATGT**AA**TGTTGCTTTTGATAATAAAAT<sup>3</sup>  
**D:** <sup>5</sup>CCCCTAGATCATCAGCTAT**ATA**TGTTGCTTTTGATAATAAAAT<sup>3</sup>  
**E:** <sup>5</sup>CCCCTAGATCATCAGCT**AA**GT**AT**GTTGCTTTTGATAATAAAAT<sup>3</sup>  
**F:** <sup>5</sup>CCCCTAGATCATCAGCT**G**TGT**AT**GTTGCTTTTGATAATAAAAT<sup>3</sup>  
**G:** <sup>5</sup>CCCCTAGATCATCAGCA**AA**TGT**AT**GTTGCTTTTGATAATAAAAT<sup>3</sup>  
**H:** <sup>5</sup>CCCCTAGATCATCAGCTATGT**AA**GTTGCTTTTGATAATAAAAT<sup>3</sup>  
**I:** <sup>5</sup>CCCCTAGATCATCAGCTATGT**ATA**TGTTGCTTTTGATAATAAAAT<sup>3</sup>  
**J:** <sup>5</sup>CCCCTAGATCATCAGCTATGT**ATGA**TGTTGCTTTTGATAATAAAAT<sup>3</sup>  
**K:** <sup>5</sup>CCCCTAGATCATCAGCTATGT**ATGTA**GCTTTTGATAATAAAAT<sup>3</sup>  
**L:** <sup>5</sup>CCCCTAGATCATCAGCTATGT**ATGTTA**CTTTTGATAATAAAAT<sup>3</sup>

A-L DNA sequences are hybridized to FIT-PNA’s to create a duplex with a mismatch at a position with a defined distance and direction from BisQ. (‘A’ corresponds to K13-C580Y and ‘B’ to K13-WT.)

K13-C580Y SNP position nucleotide is marked in red, mismatched position nucleotide is highlighted in yellow.

For example: the **‘0L’:‘E’** PNA:DNA mismatched duplex is a ‘-2’ mismatch, since the mismatch position of this duplex is 2 bases from BisQ towards the DNA 5’ direction:

**‘E’ DNA:** <sup>5</sup>CCCCTAGATCATCAGCT**AA**GT**AT**GTTGCTTTTGATAATAAAAT<sup>3</sup>  
**‘0L’ PNA:** <sup>3</sup>TCGAT**ACBT**ACAACGAAA<sup>5</sup>

The same DNA sequence will create a ‘-4’ mismatch when hybridized with ‘0R’ FIT-PNA to create the **‘0R’:‘E’** PNA:DNA mismatched duplex, since now the mismatch position of the duplex is 4 bases from BisQ to the DNA 5’ direction:

**‘E’ DNA:** <sup>5</sup>CCCCTAGATCATCAGCT**AA**GT**AT**GTTGCTTTTGATAATAAAAT<sup>3</sup>  
**‘0R’ PNA:** <sup>3</sup>TCGAT**ACATB**CAACGAAA<sup>5</sup>

### Calculation of $\Delta H$ NNI

The predictive value for each duplex was calculated by summing the  $\Delta H^\circ$  (NNI) of the two NNI's in the nucleobases triad opposite BisQ and the NNI of the base stack 5' to 3' from the DNA mismatched base. The general equation is shown below:

$$\text{NNI factor} = \Delta H^\circ_{\text{NNI}} (\text{BisQ triad}) + \Delta H^\circ_{\text{NNI}} (\text{mismatch})$$

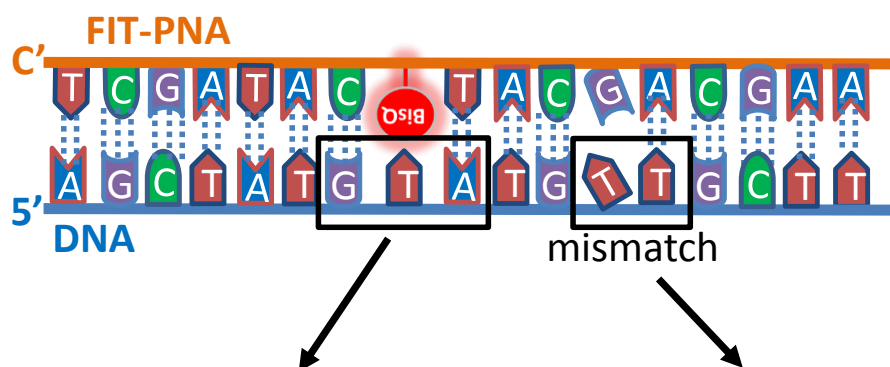

$$\Delta H^\circ_{\text{NNI}} (\text{BisQ triad}) = \Delta H^\circ (\text{GT}) + \Delta H^\circ (\text{TA})$$

$$\Delta H^\circ_{\text{NNI}} (\text{mismatch}) = \Delta H^\circ (\text{TT})$$

For a mismatch occurring adjacent to BisQ at the 5' end, one of the NNI of the triad opposite BisQ is considered un-stacked, and therefore calculated as zero.

For example: the '-3L':'U' PNA:DNA mismatched duplex shown below has a GT+TA triad NNI and an AG NNI 5' to 3' from the mismatched DNA nucleobase.

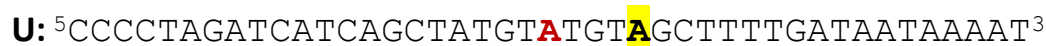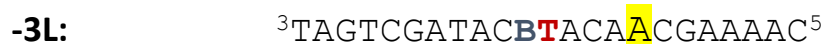

$\Delta H^\circ$  (GT) = 6.5,  $\Delta H^\circ$  (TA) = 6.0 and  $\Delta H^\circ$  (AG) = 7.8.

Therefore the predicted value for the '-3L':'U' duplex is  $\Delta H^\circ_{\text{total}} = 6.5+6+7.8=20.3$  (Table 1 shows  $\Delta H$  values).



**Table S3:** Data used to generate the scatter plot (**Figure 6**) including statistical analysis and NNI calculations:

| 'L' N=3 results and outlier analysis                       |            |      |      |      |      |      |      |      |      |      |      |      |      |      |      |      |      |      |      |      |
|------------------------------------------------------------|------------|------|------|------|------|------|------|------|------|------|------|------|------|------|------|------|------|------|------|------|
|                                                            | M          | L    | K    | H    | I    | J    | C    | D    | B    | N    | P    | O    | Q    | R    | S    | T    | U    | W    | V    |      |
| -3L                                                        | exp1       | 0.48 | 0.47 | 0.86 | 0.62 | 0.39 | 0.46 | 0.81 | 0.53 | 0.53 | 0.26 | 0.67 | 0.63 | 1.09 | 0.42 | 0.94 | 0.57 | 0.70 | 0.92 | 0.82 |
|                                                            | exp2       | 0.70 | 1.28 | 1.12 | 0.56 | 0.40 | 0.49 | 0.91 | 0.62 | 0.69 | 0.67 | 0.68 | 0.83 | 1.05 | 0.55 | 0.75 | 0.99 | 0.84 | 1.02 | 1.04 |
|                                                            | exp3       | 0.78 | 1.06 | 0.96 | 0.60 | 0.51 | 0.41 | 0.97 | 0.58 | 0.74 | 0.64 | 0.70 | 0.65 | 1.04 | 0.64 | 0.67 | 0.88 | 0.82 | 1.03 | 0.99 |
| 0L                                                         | exp1       | 0.58 | 0.72 | 0.69 | 0.41 | 0.50 | 0.40 | 0.78 | 0.54 | 0.75 | 0.26 | 0.63 | 0.82 | 1.17 | 0.47 | 1.04 | 0.68 | 0.55 | 0.66 | 0.49 |
|                                                            | exp2       | 0.84 | 1.22 | 0.97 | 0.51 | 0.47 | 0.53 | 0.92 | 0.62 | 0.77 | 0.65 | 0.84 | 1.15 | 1.07 | 0.60 | 0.78 | 0.94 | 0.80 | 0.92 | 0.94 |
|                                                            | exp3       | 0.63 | 0.98 | 0.75 | 0.55 | 0.50 | 0.50 | 1.03 | 0.65 | 0.80 | 0.55 | 0.57 | 0.71 | 1.11 | 0.67 | 0.77 | 0.77 | 0.67 | 0.78 | 0.76 |
| +3L                                                        | exp1       | 0.90 | 0.90 | 0.41 | 0.66 | 0.57 | 0.65 | 1.06 | 0.73 | 0.89 | 0.59 | 0.78 | 0.82 | 1.26 | 0.78 | 0.94 | 0.81 | 0.75 | 0.91 | 1.02 |
|                                                            | exp2       | 0.67 | 0.69 | 0.64 | 0.53 | 0.50 | 0.48 | 0.98 | 0.63 | 0.71 | 0.49 | 0.60 | 0.70 | 1.19 | 0.73 | 0.89 | 0.70 | 0.65 | 0.72 | 0.96 |
|                                                            | exp3       | 0.92 | 0.95 | 0.85 | 0.56 | 0.53 | 0.53 | 1.01 | 0.68 | 0.77 | 0.66 | 0.73 | 0.76 | 1.33 | 0.76 | 0.89 | 0.89 | 0.84 | 0.94 | 1.01 |
|                                                            | //If Avg   | 0.72 | 0.92 | 0.81 | 0.56 | 0.48 | 0.49 | 0.94 | 0.62 | 0.74 | 0.53 | 0.69 | 0.79 | 1.15 | 0.62 | 0.87 | 0.80 | 0.73 | 0.88 | 0.89 |
|                                                            | SD         | 0.15 | 0.26 | 0.21 | 0.07 | 0.06 | 0.08 | 0.10 | 0.06 | 0.10 | 0.16 | 0.09 | 0.15 | 0.10 | 0.13 | 0.13 | 0.14 | 0.10 | 0.13 | 0.18 |
|                                                            | MIN        | 0.48 | 0.47 | 0.41 | 0.41 | 0.39 | 0.40 | 0.78 | 0.53 | 0.53 | 0.26 | 0.57 | 0.63 | 1.04 | 0.42 | 0.67 | 0.57 | 0.55 | 0.66 | 0.49 |
|                                                            | MAX        | 0.92 | 1.28 | 1.12 | 0.66 | 0.57 | 0.65 | 1.06 | 0.73 | 0.89 | 0.67 | 0.84 | 1.15 | 1.33 | 0.78 | 1.04 | 0.99 | 0.84 | 1.03 | 1.04 |
|                                                            | AVG-MIN    | 0.24 | 0.45 | 0.39 | 0.14 | 0.10 | 0.16 | 0.09 | 0.09 | 0.21 | 0.27 | 0.12 | 0.16 | 0.11 | 0.21 | 0.20 | 0.23 | 0.18 | 0.22 | 0.40 |
|                                                            | MAX-AVG    | 0.20 | 0.36 | 0.32 | 0.10 | 0.09 | 0.16 | 0.12 | 0.11 | 0.15 | 0.14 | 0.15 | 0.36 | 0.18 | 0.16 | 0.16 | 0.19 | 0.11 | 0.15 | 0.15 |
|                                                            | Gmax       | 1.33 | 1.38 | 1.50 | 1.43 | 1.47 | 1.86 | 1.25 | 1.75 | 1.57 | 0.83 | 1.75 | 2.32 | 1.83 | 1.23 | 1.28 | 1.39 | 1.09 | 1.19 | 0.84 |
|                                                            | Gmin       | 1.64 | 1.72 | 1.87 | 2.05 | 1.64 | 1.15 | 1.66 | 1.40 | 2.16 | 1.65 | 1.37 | 1.03 | 1.05 | 1.65 | 1.58 | 1.71 | 1.83 | 1.70 | 2.27 |
|                                                            | Gcrit 0.05 | 2.11 | 2.11 | 2.11 | 2.11 | 2.11 | 1.94 | 2.11 | 2.11 | 2.11 | 2.11 | 2.11 | 2.11 | 2.11 | 2.11 | 1.94 | 2.11 | 2.11 | 2.11 | 2.11 |
| 'L' statistics after outlier (P<0.05, Grubbs test) removal |            |      |      |      |      |      |      |      |      |      |      |      |      |      |      |      |      |      |      |      |
|                                                            | //If Avg   | 0.72 | 0.92 | 0.81 | 0.56 | 0.48 | 0.49 | 0.94 | 0.62 | 0.76 | 0.53 | 0.69 | 0.74 | 1.15 | 0.62 | 0.87 | 0.80 | 0.73 | 0.88 | 0.93 |
|                                                            | SD         | 0.15 | 0.26 | 0.21 | 0.07 | 0.06 | 0.08 | 0.10 | 0.06 | 0.06 | 0.16 | 0.09 | 0.08 | 0.10 | 0.13 | 0.13 | 0.14 | 0.10 | 0.13 | 0.10 |

| 'L'        |      |      |      |      |      |      |      |      |      |      |      |      |      |      |      |      |      |      |      |
|------------|------|------|------|------|------|------|------|------|------|------|------|------|------|------|------|------|------|------|------|
|            | M    | L    | K    | H    | I    | J    | C    | D    | B    | N    | P    | O    | Q    | R    | S    | T    | U    | W    | V    |
| LNNI(BI+O) | 12.5 | 12.5 | 12.5 | 12.5 | 12.5 | 12.5 | 15.6 | 12.1 | 12.3 | 12.5 | 12.5 | 12.5 | 12.5 | 12.5 | 12.5 | 12.5 | 12.5 | 12.5 | 12.5 |
| Z-NNI(W/M) | 6    | 8.6  | 5.8  | 6.5  | 6.5  | 6.5  | 8.6  | 8.6  | 8.6  | 5.8  | 5.8  | 5.8  | 6.5  | 6.5  | 6.5  | 9.1  | 5.8  | 11.1 | 11.1 |
| NNI Fac    | 18.5 | 21.1 | 18.3 | 19   | 19   | 19   | 24.2 | 20.7 | 20.9 | 18.3 | 18.3 | 18.3 | 19   | 19   | 19   | 21.6 | 18.3 | 23.6 | 23.6 |
| //If Avg   | 0.72 | 0.92 | 0.81 | 0.56 | 0.48 | 0.49 | 0.94 | 0.62 | 0.76 | 0.53 | 0.69 | 0.74 | 1.15 | 0.62 | 0.87 | 0.80 | 0.73 | 0.88 | 0.93 |
| //If SD    | 0.15 | 0.26 | 0.21 | 0.07 | 0.06 | 0.08 | 0.10 | 0.06 | 0.06 | 0.16 | 0.09 | 0.08 | 0.10 | 0.13 | 0.13 | 0.14 | 0.10 | 0.13 | 0.10 |

| 'R' N=3 results and outlier analysis                       |          |      |      |      |      |      |      |      |      |      |      |      |      |      |      |      |      |      |      |      |
|------------------------------------------------------------|----------|------|------|------|------|------|------|------|------|------|------|------|------|------|------|------|------|------|------|------|
|                                                            | M        | L    | K    | H    | I    | J    | E    | G    | F    | C    | D    | B    | Q    | R    | S    | T    | U    | W    | V    |      |
| -3R                                                        | exp1     | 0.63 | 0.84 | 0.94 | 0.91 | 0.77 | 0.84 | 0.54 | 0.76 | 0.89 | 0.98 | 0.62 | 0.49 | 0.82 | 0.75 | 0.98 | 0.74 | 0.56 | 1.24 | 0.95 |
|                                                            | exp2     | 0.62 | 0.94 | 1.06 | 0.73 | 0.74 | 0.86 | 0.68 | 1.20 | 0.83 | 0.73 | 0.50 | 0.84 | 0.84 | 0.77 | 0.94 | 0.97 | 0.81 | 1.34 | 1.21 |
|                                                            | exp3     | 0.68 | 1.02 | 1.06 | 0.95 | 0.85 | 0.68 | 0.65 | 0.73 | 0.86 | 0.76 | 0.51 | 0.88 | 0.88 | 0.82 | 0.88 | 0.88 | 0.78 | 1.35 | 1.17 |
| OR                                                         | exp1     | 0.55 | 0.90 | 0.89 | 0.56 | 0.49 | 0.92 | 0.68 | 0.83 | 0.62 | 0.61 | 0.48 | 0.72 | 0.60 | 0.75 | 0.84 | 0.53 | 0.53 | 1.09 | 1.00 |
|                                                            | exp2     | 0.74 | 0.96 | 0.91 | 0.76 | 0.75 | 0.88 | 0.70 | 1.11 | 0.71 | 0.67 | 0.50 | 0.77 | 0.77 | 0.64 | 0.92 | 0.76 | 0.76 | 1.25 | 1.10 |
|                                                            | exp3     | 0.79 | 1.10 | 0.99 | 0.79 | 0.75 | 0.88 | 0.75 | 0.92 | 0.71 | 0.68 | 0.46 | 0.78 | 0.58 | 0.71 | 1.33 | 0.76 | 1.31 | 1.31 | 1.17 |
| +3R                                                        | exp1     | 0.83 | 1.03 | 0.47 | 1.25 | 1.30 | 0.95 | 0.63 | 0.97 | 0.69 | 0.77 | 0.61 | 0.97 | 0.64 | 0.71 | 0.83 | 0.64 | 1.19 | 1.03 | 1.03 |
|                                                            | exp2     | 0.92 | 1.27 | 0.99 | 0.83 | 1.06 | 0.77 | 0.76 | 1.06 | 0.58 | 0.62 | 0.49 | 0.62 | 0.53 | 0.60 | 0.92 | 0.72 | 1.32 | 1.32 | 1.11 |
|                                                            | exp3     | 0.91 | 1.09 | 0.96 | 0.83 | 1.03 | 0.87 | 0.71 | 1.00 | 0.57 | 0.62 | 0.46 | 0.83 | 0.50 | 0.73 | 0.91 | 0.73 | 1.25 | 1.07 | 1.07 |
|                                                            | Wif Avg  | 0.74 | 1.02 | 0.92 | 0.84 | 0.87 | 0.68 | 0.77 | 0.95 | 0.73 | 0.67 | 0.50 | 0.80 | 0.64 | 0.77 | 0.93 | 0.70 | 1.26 | 1.09 | 1.09 |
|                                                            | SD       | 0.13 | 0.13 | 0.18 | 0.19 | 0.24 | 0.06 | 0.07 | 0.16 | 0.14 | 0.06 | 0.04 | 0.10 | 0.12 | 0.16 | 0.17 | 0.10 | 0.08 | 0.09 | 0.09 |
|                                                            | MIN      | 0.55 | 0.84 | 0.47 | 0.56 | 0.49 | 0.77 | 0.54 | 0.72 | 0.57 | 0.61 | 0.46 | 0.62 | 0.50 | 0.60 | 0.74 | 0.53 | 0.53 | 1.09 | 0.95 |
|                                                            | MAX      | 0.92 | 1.27 | 1.06 | 1.25 | 1.30 | 0.95 | 0.76 | 1.20 | 0.98 | 0.77 | 0.61 | 0.97 | 0.82 | 0.98 | 1.33 | 0.81 | 1.35 | 1.21 | 1.21 |
|                                                            | AVG-MIN  | 0.19 | 0.17 | 0.45 | 0.28 | 0.37 | 0.10 | 0.14 | 0.24 | 0.16 | 0.07 | 0.04 | 0.18 | 0.14 | 0.17 | 0.19 | 0.17 | 0.17 | 0.14 | 0.14 |
|                                                            | MAX-AVG  | 0.18 | 0.25 | 0.14 | 0.40 | 0.44 | 0.07 | 0.08 | 0.25 | 0.25 | 0.09 | 0.11 | 0.16 | 0.18 | 0.21 | 0.40 | 0.11 | 0.09 | 0.12 | 0.12 |
|                                                            | Gmax     | 1.36 | 1.99 | 0.81 | 2.14 | 1.86 | 1.18 | 1.19 | 1.55 | 1.84 | 1.41 | 2.49 | 1.67 | 1.60 | 1.35 | 2.43 | 1.08 | 1.14 | 1.14 | 1.34 |
|                                                            | Gmin     | 1.49 | 1.37 | 2.51 | 1.51 | 1.58 | 1.61 | 2.14 | 1.47 | 1.16 | 1.05 | 0.89 | 1.88 | 1.24 | 1.07 | 1.15 | 1.73 | 2.03 | 1.65 | 1.65 |
|                                                            | Grit0.05 | 2.11 | 2.11 | 2.11 | 2.11 | 2.11 | 2.11 | 2.11 | 2.11 | 2.11 | 2.11 | 2.11 | 2.11 | 2.11 | 2.11 | 2.11 | 2.11 | 2.11 | 2.11 | 2.11 |
| 'R' statistics after outlier (P<0.05, Grubbs test) removal |          |      |      |      |      |      |      |      |      |      |      |      |      |      |      |      |      |      |      |      |
|                                                            | Wif Avg  | 0.74 | 1.02 | 0.97 | 0.80 | 0.86 | 0.87 | 0.68 | 0.77 | 0.95 | 0.73 | 0.67 | 0.48 | 0.80 | 0.64 | 0.77 | 0.93 | 0.70 | 1.26 | 1.09 |
|                                                            | SD       | 0.13 | 0.13 | 0.06 | 0.12 | 0.24 | 0.06 | 0.04 | 0.06 | 0.16 | 0.14 | 0.06 | 0.02 | 0.10 | 0.12 | 0.16 | 0.07 | 0.10 | 0.08 | 0.09 |

| 'R'         |      |      |      |      |      |      |      |      |      |      |      |      |      |      |      |      |      |      |      |
|-------------|------|------|------|------|------|------|------|------|------|------|------|------|------|------|------|------|------|------|------|
|             | M    | L    | K    | H    | I    | J    | E    | G    | F    | C    | D    | B    | Q    | R    | S    | T    | U    | W    | V    |
| 1.NNI(BisQ) | 14.4 | 14.4 | 14.4 | 14.4 | 14.4 | 14.4 | 14.4 | 14.4 | 14.4 | 5.8  | 5.8  | 5.8  | 17.7 | 14.2 | 14.6 | 14.4 | 14.4 | 14.4 | 14.4 |
| 2.NNI(MM)   | 6    | 8.6  | 5.8  | 6.5  | 6.5  | 6.5  | 6    | 6    | 6    | 8.6  | 8.6  | 8.6  | 6.5  | 6.5  | 6.5  | 9.1  | 5.8  | 11.1 | 11.1 |
| NNI Fac     | 20.4 | 23   | 20.2 | 20.9 | 20.9 | 20.9 | 20.4 | 20.4 | 20.4 | 14.4 | 14.4 | 14.4 | 24.2 | 20.7 | 21.1 | 23.5 | 20.2 | 25.5 | 25.5 |
| Wif Avg     | 0.74 | 1.02 | 0.97 | 0.80 | 0.86 | 0.87 | 0.68 | 0.77 | 0.95 | 0.73 | 0.67 | 0.48 | 0.80 | 0.64 | 0.77 | 0.93 | 0.70 | 1.26 | 1.09 |
| Wif SD      | 0.13 | 0.13 | 0.06 | 0.12 | 0.24 | 0.06 | 0.04 | 0.06 | 0.16 | 0.14 | 0.06 | 0.02 | 0.10 | 0.12 | 0.16 | 0.07 | 0.10 | 0.08 | 0.09 |

**Table S3** shows the data analysis and NNI factor calculations for generating Figure 6 in manuscript. The two tables present the I<sub>f</sub> values obtained for each PNA:DNA duplex (N=3 repetitions). Letters (in orange) notate the DNA sequences as given in Table S1 and -3\0\+3 (in light blue) notate the FIT-PNAs. Each data point corresponds to an I<sub>f</sub> value. Next, the average I<sub>f</sub> and standard deviation (SD) of each FIT-PNA frame (-3\0\+3) for N=3 is shown. Grubs test statistics to evaluate outliers in the data is shown next in the table, performed over the nine values of each averaged group. Outliers of P=0.05 (in red) were excluded and I<sub>f</sub> and standard deviation was then recalculated. The NNI factor calculation table is shown beneath each data table; for each DNA sequence the BisQ triad and mismatch NNI values are shown followed by the total NNI factor as their sum. I<sub>f</sub> and its standard deviation are shown again for convenience.
